# Supplementary material for: Solidagenone from Solidago chilensis Meyen Protects against Acute Peritonitis and Lipopolysaccharide-Induced Shock by Regulating NF-κB Signaling Pathway
Source: MDPI journal article supplement (doi:10.3390/ph17030273), 2024-02-21
Supplement: s1 [file s1]

## Supplementary Information

# **Solidagenone from *Solidago chilensis* Meyen protects against acute peritonitis and lipopolysaccharide-induced shock by regulating the NF- $\kappa$ B signaling pathway**

Ivanilson Pimenta Santos<sup>1</sup>, Laís Peres Silva<sup>1</sup>, Dahara Keyse Carvalho Silva<sup>1</sup>, Bruna Padilha Zurita Claro dos Reis<sup>1</sup>, Temistocles Barroso de Oliveira<sup>2</sup>, Andressa Maia Kelly<sup>2</sup>, Edivaldo dos Santos Rodrigues<sup>3</sup>, Claudia Valeria Campos de Souza<sup>3</sup>, José Fernando Oliveira-Costa<sup>4</sup>, Simone Sacramento Valverde<sup>2</sup>, Osvaldo Andrade Santos-Filho<sup>3</sup>, Milena Botelho Pereira Soares<sup>1,5,\*</sup>, and Cássio Santana Meira<sup>1,5,\*</sup>

<sup>1</sup> Gonçalo Moniz Institute, Oswaldo Cruz Foundation, FIOCRUZ, Salvador, BA, 40296-710, Brazil;

<sup>2</sup> Pharmaceutical Technology Institute - FarManguinhos, Natural Products Department, Oswaldo Cruz Foundation, FIOCRUZ, Rio de Janeiro, RJ, 21041-250, Brazil;

<sup>3</sup> Molecular Modeling and Computational Structural Biology Laboratory, IPPN, Health Sciences Center, Federal University of Rio de Janeiro, RJ, 21941-599, Brazil;

<sup>4</sup> Center for Infusions and Specialized Medicines of Bahia, Bahia State Health Department, Salvador, BA, 41745-900, Brazil;

<sup>5</sup> Institute of Innovation in Advanced Health Systems (ISI SAS), University Center SENAI/CIMATEC, Salvador, BA, 41650-010 Brazil.

\*Correspondence: cassio.meira@fieb.org.br; milena@bahia.fiocruz.br

## Supplementary Information

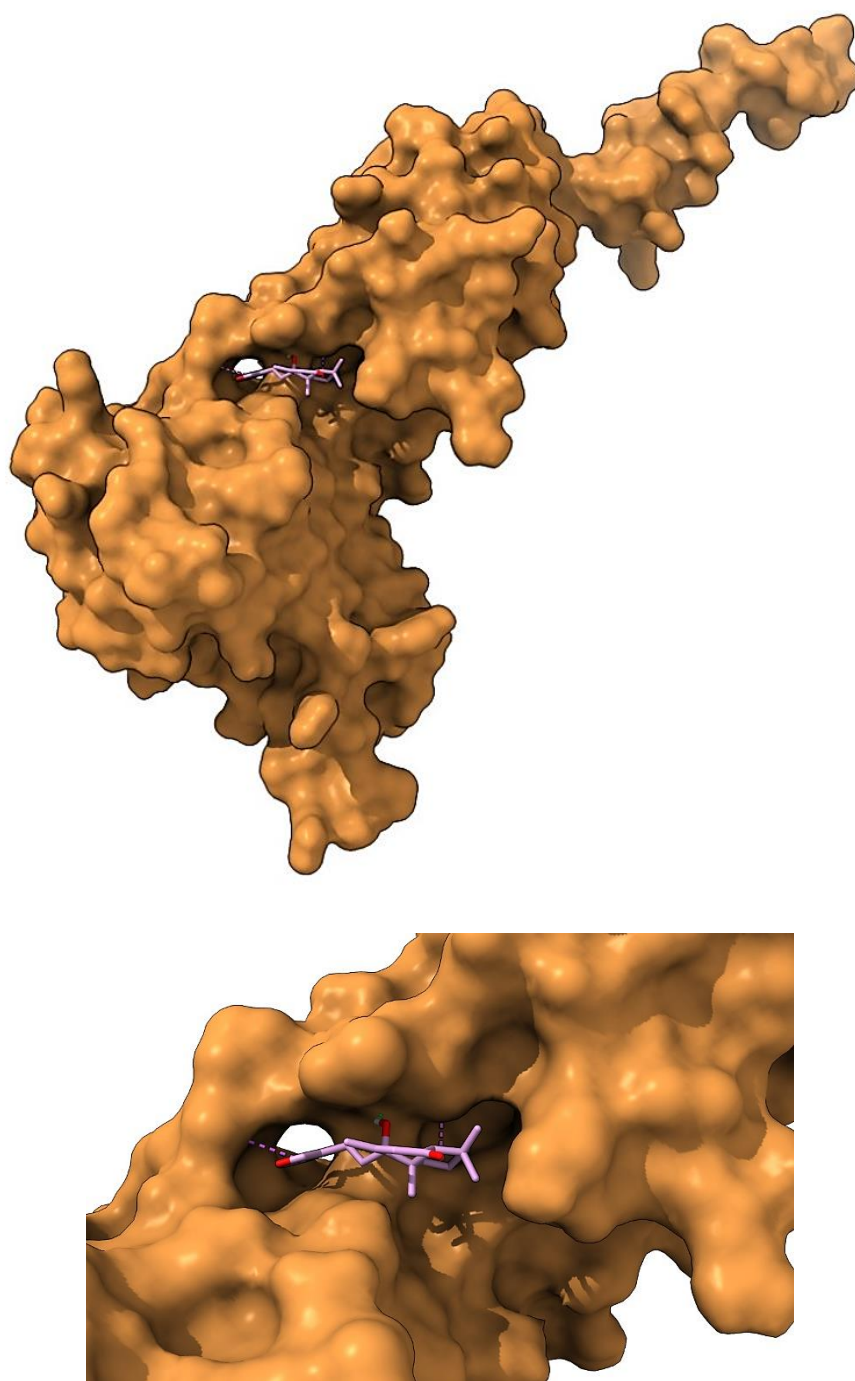

**Figure S1.** Solidagenone docked into the p65 subunit of NF-κB.

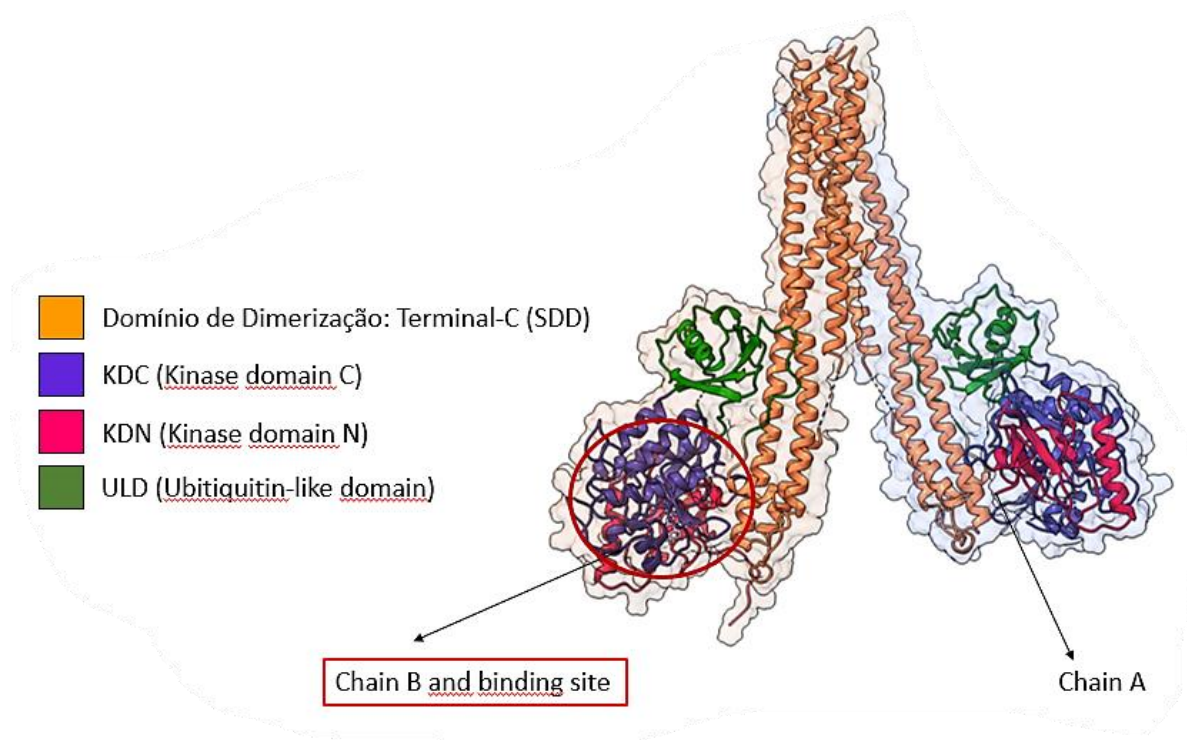

**Figure S2.** IKK system.

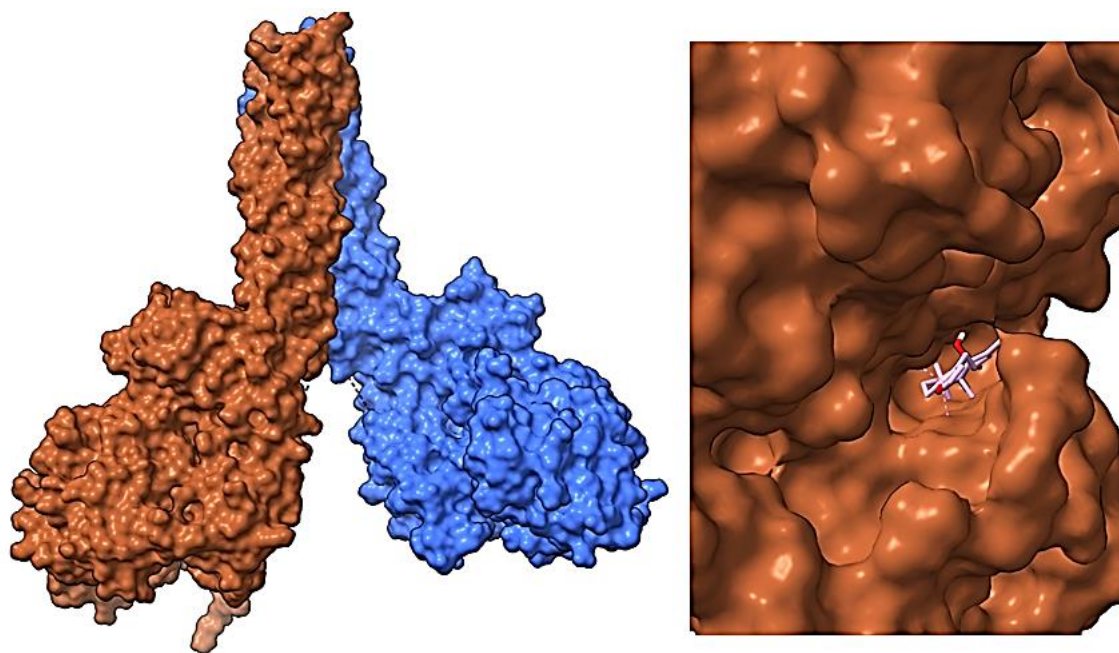

**Figure S3.** IKK system, and detail of solidagenone-IKK interaction.

**Table S1.** ADME parameters, druglikeness, and medicinal chemistry of solidagenone.

| Physicochemical Properties                  |                                                |
|---------------------------------------------|------------------------------------------------|
| Formula                                     | C <sub>20</sub> H <sub>28</sub> O <sub>3</sub> |
| Molecular weight                            | 316.43 g/mol                                   |
| Num. heavy atoms                            | 23                                             |
| Num. arom. heavy atoms                      | 5                                              |
| Fraction Csp <sup>3</sup>                   | 0.65                                           |
| Num. rotatable bonds                        | 3                                              |
| Num. H-bond acceptors                       | 3                                              |
| Num. H-bond donors                          | 1                                              |
| Molar Refractivity                          | 91.96                                          |
| TPSA                                        | 50.44 Å <sup>2</sup>                           |
| Lipophilicity                               |                                                |
| Log <i>P</i> <sub>o/w</sub> (iLOGP)         | 3.29                                           |
| Log <i>P</i> <sub>o/w</sub> (XLOGP3)        | 3.63                                           |
| Log <i>P</i> <sub>o/w</sub> (WLOGP)         | 4.30                                           |
| Log <i>P</i> <sub>o/w</sub> (MLOGP)         | 2.71                                           |
| Log <i>P</i> <sub>o/w</sub> (SILICOS-IT)    | 4.61                                           |
| Consensus Log <i>P</i> <sub>o/w</sub>       | 3.71                                           |
| Water Solubility                            |                                                |
| Log <i>S</i> (ESOL)                         | -4.05                                          |
| Solubility                                  | 2.81e-02 mg/ml; 8.88e-05 mol/l                 |
| Class                                       | Moderately soluble                             |
| Log <i>S</i> (Ali)                          | -4.38                                          |
| Solubility                                  | 1.33e-02 mg/ml; 4.19e-05 mol/l                 |
| Class                                       | Moderately soluble                             |
| Log <i>S</i> (SILICOS-IT)                   | -5.53                                          |
| Solubility                                  | 9.40e-04 mg/ml; 2.97e-06 mol/l                 |
| Class                                       | Moderately soluble                             |
| Pharmacokinetics                            |                                                |
| GI absorption                               | High                                           |
| BBB permeant                                | Yes                                            |
| P-gp substrate                              | Yes                                            |
| CYP1A2 inhibitor                            | No                                             |
| CYP2C19 inhibitor                           | No                                             |
| CYP2C9 inhibitor                            | No                                             |
| CYP2D6 inhibitor                            | Yes                                            |
| CYP3A4 inhibitor                            | Yes                                            |
| Log <i>K</i> <sub>p</sub> (skin permeation) | -5.65 cm/s                                     |
| Druglikeness                                |                                                |
| Lipinski                                    | Yes; 0 violation                               |

|                       |      |
|-----------------------|------|
| Ghose                 | Yes  |
| Veber                 | Yes  |
| Egan                  | Yes  |
| Muegge                | Yes  |
| Bioavailability Score | 0.55 |

---

#### Medicinal Chemistry

---

|                         |                             |
|-------------------------|-----------------------------|
| PAINS                   | 0 alert                     |
| Brenk                   | 0 alert                     |
| Leadlikeness            | No; 1 violation: XLOGP3>3.5 |
| Synthetic accessibility | 4.61                        |

---
